# Supplementary material for: Low Prevalence of HLA-G Antibodies in Lung Transplant Patients Detected using MAIPA-Adapted Protocol
Source: MDPI journal article supplement (doi:10.3390/ijms242216479), 2023-11-18
Supplement: s1 [file s1]

A

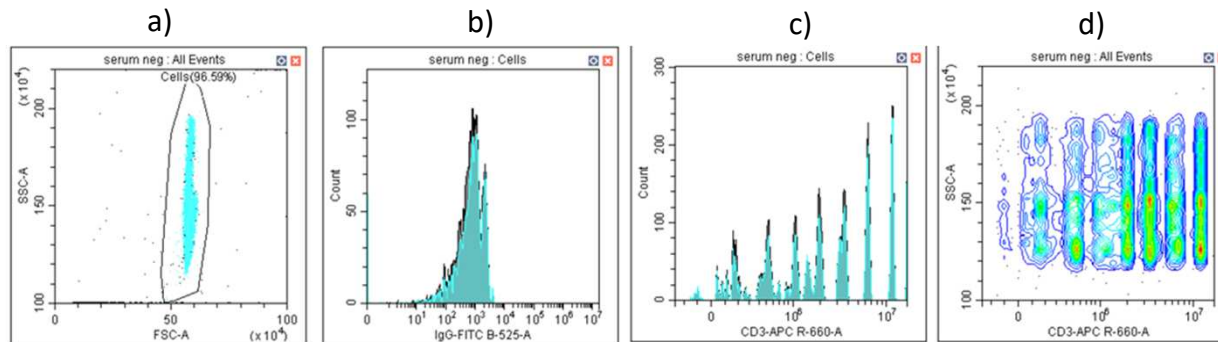

Negative serum

| Population | Events | % Parent | % Total | Median B-585-A |
|------------|--------|----------|---------|----------------|
| P1         | 8588   | 88.91%   | 85.88%  | 355.5          |

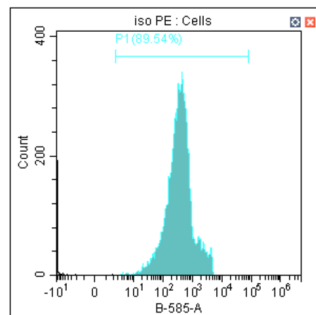

Iso-PE antibody

| Population | Events | % Parent | % Total | Median B-585-A |
|------------|--------|----------|---------|----------------|
| P1         | 8529   | 89.54%   | 85.29%  | 362.8          |

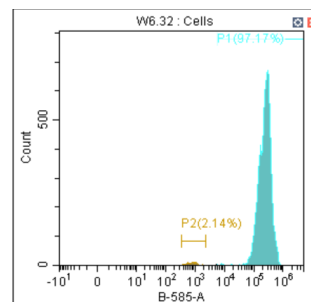

W6.32 antibody

| Population | Events | % Parent | % Total | Median B-585-A |
|------------|--------|----------|---------|----------------|
| P1         | 9248   | 97.17%   | 92.48%  | 235426.8       |
| P2         | 204    | 2.14%    | 2.04%   | 798.2          |

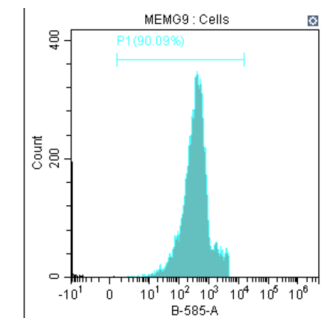

MEM-G/9 antibody

| Population | Events | % Parent | % Total | Median B-585-A |
|------------|--------|----------|---------|----------------|
| P1         | 8684   | 90.09%   | 86.84%  | 376.5          |

Supplementary figure 1: cross-reaction of MEM-G9 with other HLA I molecules such as HLA-A and/or HLA-B and/or HLA-C linked to reagent beads from A/ One Lambda Labscren HLA class I Single Antigen and B/ Immucor Lifecode HLA class I Single Antigen using Flow Cytometry.

Luminex Protocol was Adapted for DxFlex. Monoclonal antibodies MEM-G/9 conjugated to PE (ThermoFisher, ref MA1-19643), W6.32 anti-HU HLA-ABC conjugated to PE (eBioscience), and control isotype mouse IgG conjugated to PE (BioLegend) were diluted to the recommended concentration of use (5 micrograms/mL) in negative serum. These samples were processed following the initial steps of the One Lambda (OL) Single Antigen protocol and Immucor Single Antigen protocol. In summary, 5 microL of class I identification beads were incubated with 20 microL of the sample for 30 minutes with agitation. Subsequently, five washes were performed using OL Wash Buffer or Immucor Wash Buffer. The beads were then resuspended in PBS, and the suspension was analyzed using flow cytometry on the DxFlex. Gating strategy for MEM-G/9 cross-reactivity measurements were the following : Identification of beads on the level of forward scatter and side scatter (a). Measurement of the MFI on beads surface (b) Identification of beads on the PCA chanel (c) Identification of beads on the level side scatter and PCA chanel (d).

B

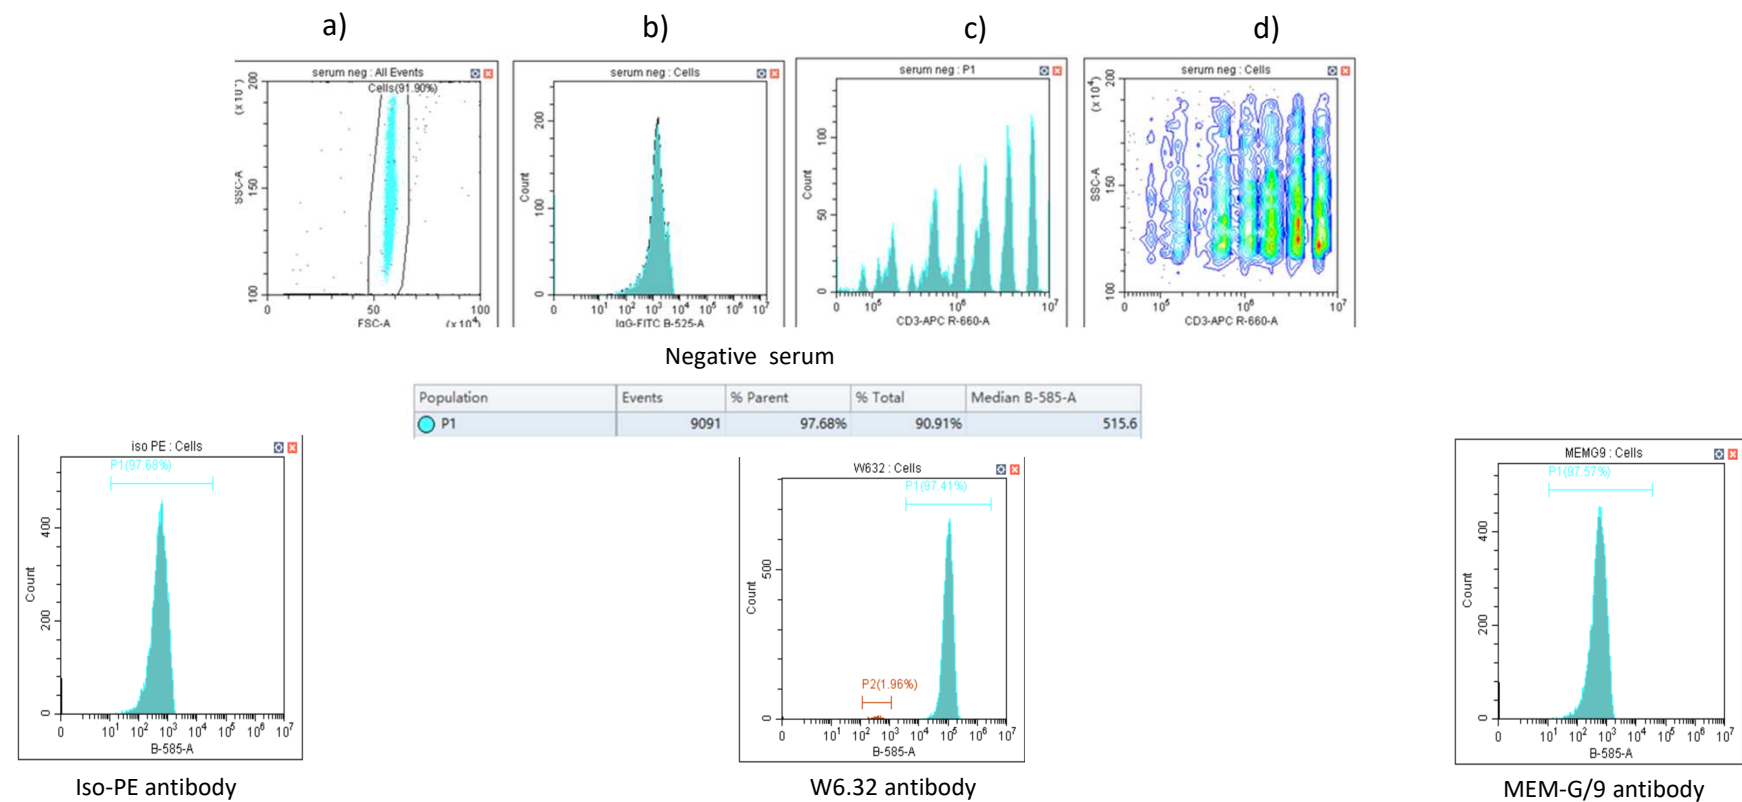

| Population | Events | % Parent | % Total | Median B-585-A |
|------------|--------|----------|---------|----------------|
| P1         | 9091   | 97.68%   | 90.91%  | 515.6          |

| Population | Events | % Parent | % Total | Median B-585-A |
|------------|--------|----------|---------|----------------|
| P1         | 8767   | 97.41%   | 87.67%  | 97092.5        |
| P2         | 176    | 1.96%    | 1.76%   | 349.8          |

| Population | Events | % Parent | % Total | Median B-585-A |
|------------|--------|----------|---------|----------------|
| P1         | 8920   | 97.57%   | 89.20%  | 528.3          |

Supplementary figure 1: cross-reaction of MEM-G9 with other HLA I molecules such as HLA-A and/or HLA-B and/or HLA-C linked to reagent beads from A/ One Lambda Labscreen HLA class I Single Antigen and B/ Immucor Lifecode HLA class I Single Antigen using Flow Cytometry.

Luminex Protocol was Adapted for DxFlex. Monoclonal antibodies MEM-G/9 conjugated to PE (ThermoFisher, ref MA1-19643), W6.32 anti-HU HLA-ABC conjugated to PE (eBioscience), and control isotype mouse IgG conjugated to PE (BioLegend) were diluted to the recommended concentration of use (5 micrograms/mL) in negative serum. These samples were processed following the initial steps of the One Lambda (OL) Single Antigen protocol and Immucor Single Antigen protocol. In summary, 5 microL of class I identification beads were incubated with 20 microL of the sample for 30 minutes with agitation. Subsequently, five washes were performed using OL Wash Buffer or Immucor Wash Buffer. The beads were then resuspended in PBS, and the suspension was analyzed using flow cytometry on the DxFlex. Gating strategy for MEM-G/9 cross-reactivity measurements were the following : Identification of beads on the level of forward scatter and side scatter (a). Measurement of the MFI on beads surface (b) Identification of beads on the PCA chanel (c) Identification of beads on the level side scatter and PCA chanel (d).

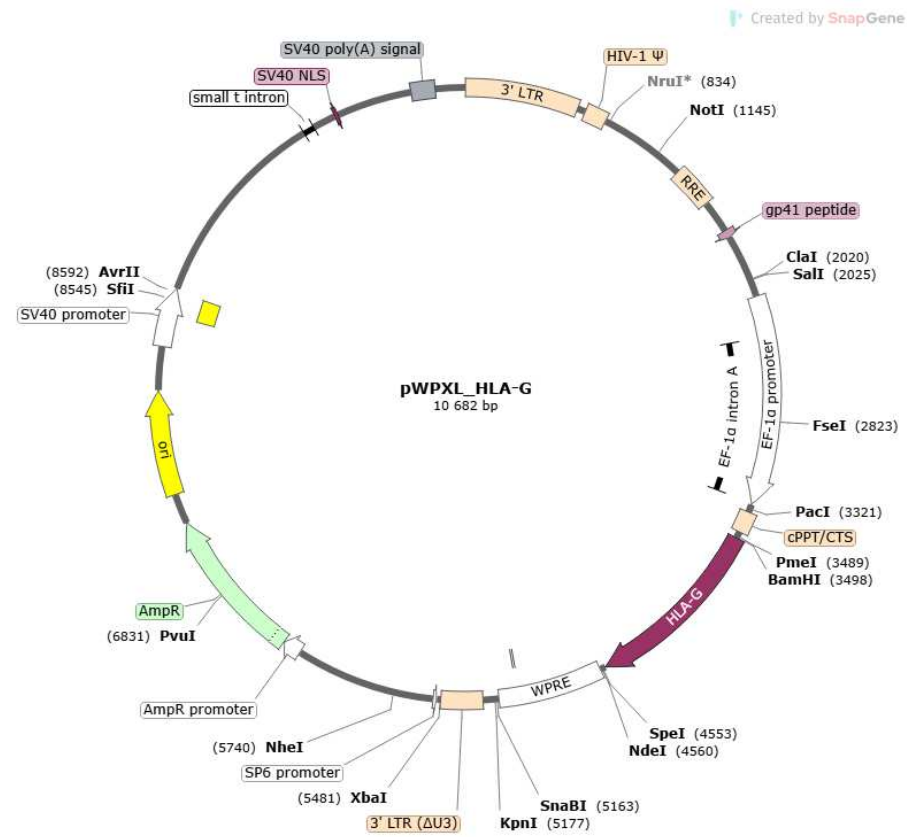

Supplementary figure 2: Plasmid map of the pWPXL\_HLA-G construct

>CDS\_HLA-G\_010101

ATGGTGGTCATGGCGCCCCGAACCCCTCTTCTGCTGCTCTCGGGGGCCCTGACCCTGACCGAGACCTGGGCGGGCTCCCACTCCATGAGGTATTTACGCGCCGCCGTGTCCCGGCCCGCCGCGGGGAGCCCCGCTTCATCGCCATGGGCTACGTGGA  
CGACACGCAGTTTCGTGCGGTTTCGACAGCGACTCGGCGTGTCCGAGGATGGAGCCGCGGGCGCCGTGGGTGGAGCAGGAGGGGCCGAGTATTGGGAAGAGGAGACACGGAACACCAAGGCCACGCACAGACTGACAGAATGAACCTGCAGACC  
CTGCGCGGCTACTACAACCAGAGCGAGGCCAGTTCTCACACCTCCAGTGGATGATTGGCTGCGACCTGGGGTCCGACGGACGCCTCTCCGCGGGTATGAACAGTATGCCTACGATGGCAAGGATTACCTCGCCCTGAACGAGGACCTGCGCTCCTG  
GACCGCAGCGGACACTGCGGCTCAGATCTCCAAGCGCAAGTGTGAGGCGGCCAATGTGGCTGAACAAAGGAGAGCCTACCTGGAGGGCACGTGCGTGGAGTGGCTCCACAGATACTGGAGAACGGGAAGGAGATGCTGCAGCGCGCGGACCCCC  
CCAAGACACACGTGACCCACCACCTGTCTTTGACTATGAGGCCACCCTGAGGTGCTGGGCCCTGGGCTTCTACCTGCGGAGATCATACTGACCTGGCAGCGGGATGGGGAGGACCAGACCCAGGACGTGGAGCTCGTGGAGACCAGGCCTGCAGG  
GGATGGAACCTTCAGAAGTGGGCAGCTGTGGTGGTGCTTCTGGAGAGGAGCAGAGATACACGTGCCATGTGCAGCATGAGGGGCTGCCGGAGCCCTCATGCTGAGATGGAAGCAGTCTTCCCTGCCACCATCCCCATCATGGGTATCGTTGCT  
GGCCTGGTTGCTTGCAGCTGTAGTCACTGGAGCTGCGGTCGCTGCTGTGCTGTGGAGAAAGAAGAGCTCAGATTGA

>CDS\_HLA-G\_010401

ATGGTGGTCATGGCACCCCGAACCCCTCTTCTGCTACTCTCGGGGGCCCTGACCCTGACCGAGACCTGGGCGGGCTCCCACTCCATGAGGTATTTACGCGCCGCCGTGTCCCGGCCCGCCGCGGGGAGCCCCGCTTCATCGCCATGGGCTACGTGGA  
CGACACGCAGTTTCGTGCGGTTTCGACAGCGACTCGGCGTGTCCGAGGATGGAGCCGCGGGCGCCGTGGGTGGAGCAGGAGGGGCCAGAGTATTGGGAAGAGGAGACACGGAACACCAAGGCCACGCACAGACTGACAGAATGAACCTGCAGACC  
CTGCGCGGCTACTACAACCAGAGCGAGGCCAGTTCTCACACCTCCAGTGGATGATTGGCTGCGACCTGGGGTCCGACGGACGCCTCATCCGCGGGTATGAACAGTATGCCTACGATGGCAAGGATTACCTCGCCCTGAACGAGGACCTGCGCTCCTG  
GACCGCAGCGGACACTGCGGCTCAGATCTCCAAGCGCAAGTGTGAGGCGGCCAATGTGGCTGAACAAAGGAGAGCCTACCTGGAGGGCACGTGCGTGGAGTGGCTCCACAGATACTGGAGAACGGGAAGGAGATGCTGCAGCGCGCGGACCCCC  
CCAAGACACACGTGACCCACCACCTGTCTTTGACTATGAGGCCACCCTGAGGTGCTGGGCCCTGGGCTTCTACCTGCGGAGATCATACTGACCTGGCAGCGGGATGGGGAGGACCAGACCCAGGACGTGGAGCTCGTGGAGACCAGGCCTGCAGG  
GGATGGAACCTTCAGAAGTGGGCAGCTGTGGTGGTGCTTCTGGAGAGGAGCAGAGATACACGTGCCATGTGCAGCATGAGGGGCTGCCGGAGCCCTCATGCTGAGATGGAAGCAGTCTTCCCTGCCACCATCCCCATCATGGGTATCGTTGCT  
GGCCTGGTTGCTTGCAGCTGTAGTCACTGGAGCTGCGGTCGCTGCTGTGCTGTGGAGGAAGAAGAGCTCAGATTGA

>CDS\_HLA-G\_0106

ATGGTGGTCATGGCACCCCGAACCCCTCTTCTGCTACTCTCGGGGGCCCTGACCCTGACCGAGACCTGGGCGGGCTCCCACTCCATGAGGTATTTACGCGCCGCCGTGTCCCGGCCCGCCGCGGGGAGCCCCGCTTCATCGCCATGGGCTACGTGGAC  
GACACGCAGTTTCGTGCGGTTTCGACAGCGACTCGGCGTGTCCGAGGATGGAGCCGCGGGCGCCGTGGGTGGAGCAGGAGGGGCCAGAGTATTGGGAAGAGGAGACACGGAACACCAAGGCCACGCACAGACTGACAGAATGAACCTGCAGACCC  
TGCGCGGCTACTACAACCAGAGCGAGGCCAGTTCTACACCTCCAGTGGATGATTGGCTGCGACCTGGGGTCCGACGGACGCCTCCTCCGCGGGTATGAACAGTATGCCTACGATGGCAAGGATTACCTCGCCCTGAACGAGGACCTGCGCTCCTGG  
ACCGCAGCGGACACTGCGGCTCAGATCTCCAAGCGCAAGTGTGAGGCGGCCAATGTGGCTGAACAAAGGAGAGCCTACCTGGAGGGCACGTGCGTGGAGTGGCTCCACAGATACTGGAGAACGGGAAGGAGATGCTGCAGCGCGCGGACCCCC  
CAAGACACACGTGACCCACCACCTGTCTTTGACTATGAGGCCACCCTGAGGTGCTGGGCCCTGGGCTTCTACCTGCGGAGATCATACTGACCTGGCAGCGGGATGGGGAGGACCAGACCCAGGACGTGGAGCTCGTGGAGACCAGGCCTGCAGG  
GGATGGAACCTTCAGAAGTGGGCAGCTGTGGTGGTGCTTCTGGAGAGGAGCAGAGATACATGTGCCATGTGCAGCATGAGGGGCTGCCGGAGCCCTCATGCTGAGATGGAAGCAGTCTTCCCTGCCACCATCCCCATCATGGGTATCGTTGCT  
GGTCTGGTTGCTTGCAGCTGTAGTCACTGGAGCTGCGGTCGCTGCTGTGCTGTGGAGGAAGAAGAGCTCAGATTGA

Supplementary figure 3 : The nucleotide sequences of HLA-G\*01:01, \*01:04 and \*01:06

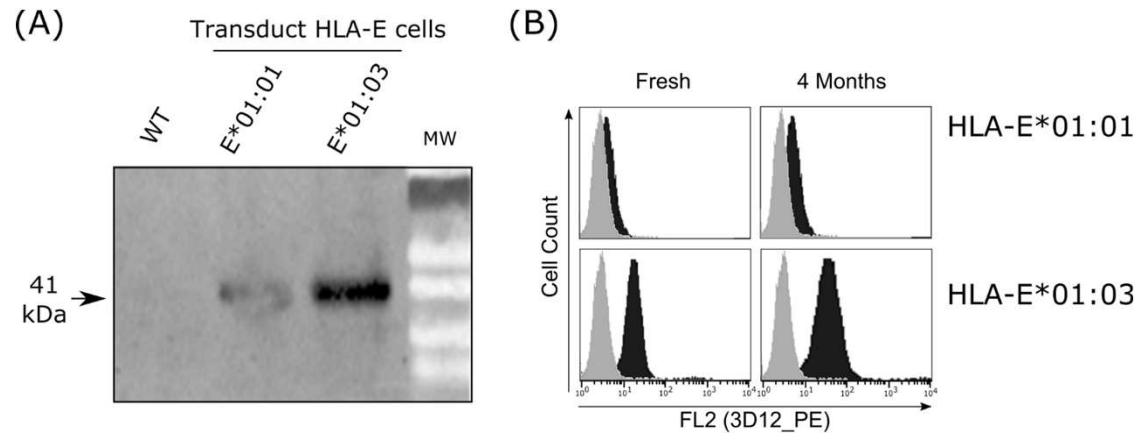

Supplementary figure 4: Expression of HLA-E isoform on SPI801 cell lines. (A) Western Blot analysis of HLA-E in the transduced cells in comparison with non-transduced cells (WT = wild type). (B) Stable expression levels of HLA-E isoform in transduced cells (black) versus non-transduced cells (gray) by flow cytometry.

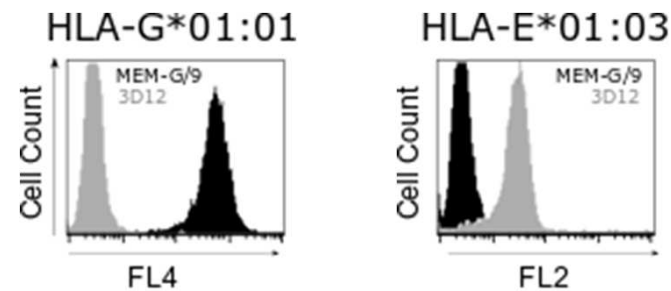

Supplementary figure 5: Specificity of detection of HLA-G and HLA-E by MEMG/9 and 3D12, respectively. Histograms show flow cytometry analysis of cells stained with MEM-G/9 (anti HLA-G antibody) in black or 3D12 (anti HLA-E antibody) in grey. Left histogram shows absence of detection of HLA-E on HLA-G\*01:01 cells. Right histogram shows absence of detection of HLA-G on HLA-E\*01:03 cells. Same analysis was performed on HLA-G\*01:04, HLA-G\*01:06 and HLA-E\*01:01 cells line (Data not shown).
