# Supplementary material for: Low Prevalence of HLA-G Antibodies in Lung Transplant Patients Detected using MAIPA-Adapted Protocol
Source: MDPI journal article supplement (doi:10.3390/ijms242216479), 2023-11-18
Supplement: s1 [file s1]

Table S1. Results of DSA in LTRs cohort at D0, D15, M1, M3 and M12 after LTx

|          | Characteristic of Pathology |                                                                                                                            |             |              |                   |                 |     | Collection Dates (D : Day ; M: Month) |                             |            |                            |                             |                                                                                 |                            |                             |                        |                            |                             |            | HLA-G Typing               |                             |             |                 |                |
|----------|-----------------------------|----------------------------------------------------------------------------------------------------------------------------|-------------|--------------|-------------------|-----------------|-----|---------------------------------------|-----------------------------|------------|----------------------------|-----------------------------|---------------------------------------------------------------------------------|----------------------------|-----------------------------|------------------------|----------------------------|-----------------------------|------------|----------------------------|-----------------------------|-------------|-----------------|----------------|
|          |                             |                                                                                                                            |             |              |                   |                 |     | Do                                    |                             |            | D15                        |                             |                                                                                 | M1                         |                             |                        | M3                         |                             |            |                            |                             | M12         |                 |                |
| Patients | Disease                     | CMV Status<br>0: absence mismatch ;<br>1:D+ et R- without seroconversion;<br>2:D+ et R- with seroconversion;<br>3:D- et R+ | Type of LTx | HLA mismatch | Chronic rejection | Acute rejection | DSA | DSA class I one lambda MFI            | DSA class II one lambda MFI | Ab non DSA | DSA class I one lambda MFI | DSA class II one lambda MFI | Ab non DSA                                                                      | DSA class I one lambda MFI | DSA class II one lambda MFI | Ab non DSA             | DSA class I one lambda MFI | DSA class II one lambda MFI | Ab non DSA | DSA class I one lambda MFI | DSA class II one lambda MFI | Ab non DSA  | Genotypes HLA-G | Haplotypes UTR |
| 1        | Histicocytosis              | 0                                                                                                                          | bilateral   | 8            | Yes               |                 | D15 | 0                                     | 0                           | No         | 0                          | DQ3:10500<br>DQ5:2600       | 0                                                                               | DQ5:8000<br>DQA03:9000     | No                          | 0                      | DQ3:5000                   | No                          | 0          | 0                          | No                          | G*01:01,*-- | UTR2, UTR4      |                |
| 2        | Cystic fibrosis             | 0                                                                                                                          | bilateral   | 7            |                   |                 |     | 0                                     | 0                           | No         | 0                          | 0                           | 0                                                                               | 0                          | No                          | 0                      | 0                          | No                          | 0          | 0                          | No                          | G*01:01,*-- | UTR1, UTR1      |                |
| 3        | Fibrosis                    | 0                                                                                                                          | bilateral   | 8            |                   |                 | M1  | 0                                     | 0                           | No         | 0                          | 0                           | 0                                                                               | DQ7:4000                   | No                          | 0                      | 0                          | No                          | 0          | 0                          | No                          | G*01:01,*-- | UTR1, UTR1      |                |
| 4        | Fibrosis                    | 3                                                                                                                          | bilateral   | 0            |                   | M12             | D15 | 0                                     | 0                           | No         | 0                          | DR7:2500<br>DQ2:1500        | A30:4500<br>DR7:5000<br>B13:8000<br>DQ2:1000<br>Cw4000<br>DR53:3000<br>CW5:2000 | No                         | 0                           | DQ2:5000,<br>DR53:4000 | No                         | 0                           | 0          | No                         | G*01:01,*--                 | UTR1, UTR1  |                 |                |
| 5        | Emphysema                   | 0                                                                                                                          | single      | 3            |                   |                 |     | 0                                     | 0                           | No         | 0                          | 0                           | 0                                                                               | 0                          | No                          | 0                      | 0                          | No                          | 0          | 0                          | No                          | G*01:01,*-- | UTR1, UTR4      |                |

|    |                 |   |            |   |  |    |     |          |          |    |                                    |          |  |                                |                      |      |                                    |                       |    |         |   |    |                  |            |
|----|-----------------|---|------------|---|--|----|-----|----------|----------|----|------------------------------------|----------|--|--------------------------------|----------------------|------|------------------------------------|-----------------------|----|---------|---|----|------------------|------------|
| 6  | Cystic fibrosis | 3 | bilat eral | 8 |  |    |     | 0        | 0        | No | 0                                  | 0        |  | 0                              | 0                    | Ye s | 0                                  | 0                     | No | 0       | 0 | No | G*01:01,*--      | UTR1, UTR2 |
| 7  | Emphys ema      | 2 | bilat eral | 6 |  |    |     | 0        | 0        | No | 0                                  | 0        |  | 0                              | 0                    | No   | 0                                  | 0                     | No | 0       | 0 | No | G*01:01,G*01:06  | UTR2, UTR6 |
| 8  | Cystic fibrosis | 0 | bilat eral | 6 |  |    | M 1 | 0        | 0        | No | 0                                  | 0        |  | B44:3300<br>A1:2400<br>B8:1500 | DQ2:6300             | No   | 0                                  | 0                     | No | 0       | 0 | No | G*01:01,G*01:04  | UTR1, UTR3 |
| 9  | Emphys ema      | 0 | bilat eral | 6 |  |    | D0  | B7:11000 | B7:11000 | No | B7:13000                           | 0        |  | B7:7000                        | 0                    | No   | B7:3000                            | 0                     | No | B7:3000 | 0 | No | G*01:01,G*01:06  | UTR2, UTR2 |
| 10 | Cystic fibrosis | 0 | bilat eral | 6 |  |    | M 3 | 0        | 0        | No | 0                                  | 0        |  | 0                              | 0                    | Ye s | A30:1500<br>DQ2:12000<br>DR53:3000 | DQ2:12000             | No | 0       | 0 | No | G*01:01,G*01:04  | UTR3, UTR6 |
| 11 | Emphys ema      | 0 | bilat eral | 0 |  |    | D15 | 0        | 0        | No | B44:5000                           | 0        |  | 0                              | 0                    | No   | 0                                  | 0                     | No | 0       | 0 | No | G*01:01,G*01:06  | UTR2, UTR2 |
| 12 | Cystic fibrosis | 0 | singl e    | 8 |  | M1 | D15 | 0        | 0        | No | A25:4500<br>DQ5:10000<br>DQ6:13000 |          |  | 0                              | DQ5:5000<br>DQ6:5000 | No   | 0                                  | 0                     | No | 0       | 0 | No | G*01:01,G*01:05N | UTR4, UTR3 |
| 13 | Cystic fibrosis | 0 | singl e    | 7 |  |    | M 1 | 0        | 0        | No | 0                                  | 0        |  | B45:2000                       | DQ6:6000             | No   | 0                                  | 0                     | No | 0       | 0 | No | G*01:01,*--      | UTR1, UTR2 |
| 14 | Fibrosis        | 0 | bilat eral | 8 |  |    | M 1 | 0        | 0        | No | 0                                  | 0        |  | 0                              | DQ9:4900             | Ye s | 0                                  | 0                     | No | 0       | 0 | No | G*01:01,G*01:04  | UTR3, UTR7 |
| 15 | Cystic fibrosis | 0 | bilat eral | 7 |  |    | M 1 | 0        | 0        | No | 0                                  | 0        |  | B44:5000                       | DQ2:14000            | No   | 0                                  | 0                     | No | 0       | 0 | No | G*01:01,*--      | UTR1, UTR2 |
| 16 | Fibrosis        | 2 | singl e    | 7 |  |    |     | 0        | 0        | No | 0                                  | 0        |  | 0                              | 0                    | No   | 0                                  | 0                     | No | 0       | 0 | No | G*01:01,*--      | UTR2, UTR6 |
| 17 | Fibrosis        | 0 | bilat eral | 4 |  |    | D15 | 0        | 0        | No | 0                                  | DQ2:9000 |  | 0                              | DQ2:8000             | No   | 0                                  | DR7:4000<br>DQ2:12000 | No | 0       | 0 | No | G*01:01,G*01:03  | UTR1, UTR2 |

|    |                                |   |               |   |     |     |         |   |   |         |             |                                                                  |                              |                                                 |         |   |               |         |   |              |         |                      |               |
|----|--------------------------------|---|---------------|---|-----|-----|---------|---|---|---------|-------------|------------------------------------------------------------------|------------------------------|-------------------------------------------------|---------|---|---------------|---------|---|--------------|---------|----------------------|---------------|
| 18 | Cystic fibrosis                | 0 | bilat<br>eral | 5 |     |     | M<br>1  | 0 | 0 | No      | 0           | 0                                                                | A2:31<br>00,<br>B44:2<br>900 | 0                                               | Ye<br>s | 0 | 0             | No      | 0 | 0            | No      | G*01:01,*--          | UTR4,<br>UTR2 |
| 19 | Cystic fibrosis                | 0 | bilat<br>eral | 8 |     |     | D1<br>5 | 0 | 0 | Ye<br>s | 0           | DQ5<br>:9500<br>DQ6<br>:9500                                     | 0                            | DQ5:75<br>00<br>DQ6:60<br>00                    | Ye<br>s | 0 | DQ5:3<br>500  | No      | 0 | 0            | No      | G*01:03,G*<br>01:06  | UTR2,<br>UTR5 |
| 20 | Cystic fibrosis                | 0 | singl<br>e    | 6 |     |     |         | 0 | 0 | No      | 0           | 0                                                                | 0                            | 0                                               | No      | 0 | 0             | No      | 0 | 0            | No      | G*01:01,*--          | UTR1,<br>UTR6 |
| 21 | Fibrosis                       | 0 | bilat<br>eral | 0 | Yes | M3  | M<br>1  | 0 | 0 | No      | 0           | 0                                                                | 0                            | DQ2:13<br>000                                   | No      | 0 | DQ2:4<br>500  | No      | 0 | DQ2:6<br>000 | No      | G*01:01,G*<br>01:04  | UTR4,<br>UTR3 |
| 22 | Emphys<br>ema                  | 2 | bilat<br>eral | 5 | Yes |     | D1<br>5 | 0 | 0 | Ye<br>s | 0           | DQ4:1<br>3000<br>DR8:4<br>000                                    | B58:2<br>000                 | DQ4:15<br>000                                   | No      | 0 | DQ4:5<br>000  | Ye<br>s | 0 | 0            | Ye<br>s | G*01:01,*--          | UTR1,<br>UTR2 |
| 23 | Bronchi<br>al<br>Dysplasi<br>a | 3 | bilat<br>eral | 7 | Yes |     | D0      | 0 | 0 | No      | 0           | DQ7:9<br>000                                                     | 0                            | DQ7:90<br>00                                    | No      | 0 | DQ7:9<br>000  | Ye<br>s | 0 | 0            | No      | G*01:01,*--          | UTR4,<br>UTR6 |
| 24 | Cystic fibrosis                | 0 | bilat<br>eral | 0 |     |     |         | 0 | 0 | No      | 0           | 0                                                                | 0                            | 0                                               | No      | 0 | 0             | No      | 0 | 0            | No      | G*01:01,G*<br>01:05N | UTR1,<br>UTR2 |
| 25 | Fibrosis                       | 0 | singl<br>e    | 6 |     |     |         | 0 | 0 | No      | 0           | 0                                                                | 0                            | 0                                               | No      | 0 | 0             | No      | 0 | 0            | No      | G*01:01,*--          | UTR4,<br>UTR7 |
| 26 | Cystic fibrosis                | 0 | bilat<br>eral | 6 |     |     | D1<br>5 | 0 | 0 | No      | 0           | DQ7<br>:12000<br>DR12<br>:6000<br>DR52<br>:2500<br>DR11<br>:1500 | 0                            | DQ7:16<br>000<br>DR12:3<br>500<br>DR52:1<br>700 | No      | 0 | 0             | Ye<br>s | 0 | 0            | No      | G*01:01,*--          | UTR1,<br>UTR2 |
| 27 | Emphys<br>ema                  | 0 | singl<br>e    | 7 | Yes | M12 | M<br>1  | 0 | 0 | No      | A2:90<br>00 | DR8<br>:8000                                                     | A23:1<br>2000                | 0                                               | No      | 0 | 0             | No      | 0 | 0            | No      | G*01:01,*--          | UTR1,<br>UTR2 |
| 28 | Cystic fibrosis                | 3 | bilat<br>eral | 7 |     | M3  | M<br>1  | 0 | 0 | No      | 0           | 0                                                                | A2:70<br>00<br>A24:5         | DQ2:12<br>000                                   | No      | 0 | DQ2:1<br>0000 | No      | 0 | DQ2:6<br>000 | No      | G*01:01,*--          | UTR2,<br>UTR4 |

|    |                    |   |               |   |     |    |        |              |              |    |   |   |                                             |                                                  |    |                              |               |         |   |   |         |                     |               |
|----|--------------------|---|---------------|---|-----|----|--------|--------------|--------------|----|---|---|---------------------------------------------|--------------------------------------------------|----|------------------------------|---------------|---------|---|---|---------|---------------------|---------------|
|    |                    |   |               |   |     |    |        |              |              |    |   |   | 000<br>B44:3<br>000<br>B38:1<br>5000        | DR53:2<br>550                                    |    |                              |               |         |   |   |         |                     |               |
| 29 | Cystic<br>fibrosis | 1 | bilat<br>eral | 7 |     |    |        | 0            | 0            | No | 0 | 0 | 0                                           | 0                                                | No | 0                            | 0             | No      | 0 | 0 | No      | G*01:01,G*<br>01:04 | UTR1,<br>UTR3 |
| 30 | Cystic<br>fibrosis | 2 | bilat<br>eral | 7 |     | M3 | M<br>1 | 0            | 0            | No | 0 | 0 | A26:1<br>2000<br>A3:85<br>00<br>B7:85<br>00 | DQ4:18<br>500,<br>DR8:41<br>00,<br>DR15:4<br>000 | No | 0                            | DQ4:1<br>6000 | Ye<br>s | 0 | 0 | No      | G*01:01,*--         | UTR1,<br>UTR2 |
| 31 | Cystic<br>fibrosis | 0 | bilat<br>eral | 8 | Yes |    | M<br>1 | 0            | 0            | No | 0 | 0 | B8:36<br>00                                 | DQ2:11<br>000                                    | No | B8:<br>2000                  | 0             | Ye<br>s | 0 | 0 | Ye<br>s | G*01:01,*--         | UTR7,<br>UTR1 |
| 32 | Fibrosis           | 3 | singl<br>e    | 6 |     |    | D0     | B27:6<br>000 | B27:6<br>000 | No | 0 | 0 | 0                                           | 0                                                | No | 0                            | 0             | No      | 0 | 0 | No      | G*01:01,G*<br>01:04 | UTR1,<br>UTR3 |
| 33 | Cystic<br>fibrosis | 0 | bilat<br>eral | 0 |     | M3 | M<br>1 | 0            | 0            | No | 0 | 0 | A31:2<br>000                                | 0                                                | No | 0                            | 0             | Ye<br>s | 0 | 0 | No      | G*01:01,G*<br>01:06 | UTR2,<br>UTR2 |
| 34 | Emphys<br>ema      | 0 | singl<br>e    | 5 |     |    | M<br>1 | 0            | 0            | No | 0 | 0 | B8:13<br>000                                | DR17:1<br>4500<br>DQ7:13<br>000<br>DR4:45<br>00  | No | 0                            | 0             | No      | 0 | 0 | No      | G*01:01,*--         | UTR1,<br>UTR7 |
| 35 | Fibrosis           | 0 | bilat<br>eral | 7 | Yes |    | M<br>1 | 0            | 0            | No | 0 | 0 | A32:<br>7200                                | DQ9:58<br>00,<br>DR12:5<br>500,<br>DR7:19<br>00  | No | A32:<br>5900<br>B57:<br>2000 | 0             | No      | 0 | 0 | No      | G*01:01,*--         | UTR1,<br>UTR1 |
